# Supplementary material
Source: PubMed Central journal article supplement (PMC11145511)
Supplement: jama-e2410398-s003.pdf [file jama-e2410398-s003.pdf]

## Supplemental Online Content

Temel JS, Jackson VA, El-Jawahri A, et al. Stepped palliative care for patients with advanced lung cancer. *JAMA*. Published online June 2, 2024.  
doi:10.1001/jama.2024.10398

**eAppendix 1.** Self-Report Assessments

**eAppendix 2.** Sensitivity Analysis Methods for Primary FACT-L 24-Week Outcome Measure

**eAppendix 3.** Participant Race Selected as Other

**eTable 1.** FACT-L Completion by Study Group at Weeks 36 and 48

**eTable 2.** Baseline Characteristics by Week 24 FACT-L Completion

**eTable 3.** FACT-L Completion Among Stepped PC Patients on Step 1 at All Study Timepoints

**eTable 4.** Sensitivity Analysis Model Estimates of Study Group Effects on Primary FACT-L 24-Week Outcome Measure

**eFigure 1.** Stepped PC Study Procedures

**eFigure 2.** Intervention Delivery Up to 24 and 48 Weeks

**eFigure 3.** Patient-Reported Quality of Life Over 48 Weeks

This supplemental material has been provided by the authors to give readers additional information about their work.

## **eAppendix 1. Self-Report Assessments**

Socio-demographic questionnaire: Patients reported age, gender, race/ethnicity, marital status, religion, education level, employment status, income, and tobacco use.

Self-Administered Comorbidity Questionnaire (SCQ): A 13-item questionnaire that assigns a comorbidity score ranging from 0-36, with higher scores indicating greater comorbidity.

Functional Assessment of Cancer Therapy-Lung (FACT-L): A 34-item tool that assesses physical, social/family, emotional, and functional well-being and lung cancer-specific symptoms over the past seven days with a 0 (not at all) to 4 (very much) point scale with scores ranging from 0-136 to assess QOL. Higher scores indicate a better QOL.

Patient Health Questionnaire-9 (PHQ-9): A nine-item measure with a 0 (not at all) to 3 (nearly every day) point scale that evaluates symptoms of major depressive disorder according to the criteria of the *Diagnostic and Statistical Manual of Mental Disorders*. Scores range from 0-27, with higher scores indicating more significant depression symptoms.

Brief-COPE: A 16-item modified version of the Brief COPE, with a 1 (not at all) to 4 (a lot) point scale, generating two factors assessing approach-oriented (score range: 6-24) and avoidant (score range: 4-16) coping. Higher scores indicate greater use of each strategy.

Prognosis and Treatment Perceptions Questionnaire (PTPQ): A 24-item measure to assess patients' self-reported prognostic understanding, including items inquiring about the primary goal of cancer treatment ("to cure my cancer" vs. other), perception of whether the cancer is curable (yes/no), and whether the patient discussed their end-of-life care wishes with their clinician (yes/no).

## **eAppendix 2. Sensitivity Analysis Methods for Primary FACT-L 24-Week Outcome Measure**

In this eAppendix, we summarize the statistical methods used to conduct sensitivity analyses to evaluate the potential impact of missing data on the primary QOL outcome, FACT-L at week 24. Results from these sensitivity analyses are reported in eTable 4.

Our primary analysis of FACT-L at week 24 used a linear regression model with main effects for randomized intervention group, randomization stratification factors (study site and type of lung cancer) and baseline FACT-L score. The primary analysis excluded participants with missing FACT-L scores (e.g., due to nonresponse, loss to follow-up, or death).

Three sensitivity analyses were conducted to evaluate the impact of missing data on results for the primary outcome:

1. Sensitivity analysis using linear mixed effects model to incorporate longitudinal data.

We used a linear mixed effects regression model to estimate the difference in week 24 FACT-L means between intervention groups. This approach incorporates additional longitudinal data from participants into the analysis. This model utilized FACT-L scores at baseline, week 12, and week 24, with estimation via maximum likelihood. We included fixed effects for randomized intervention group, time from baseline (in weeks), group-by-time interaction, and randomization stratification factors, as well as random intercepts for each patient. A contrast was used to estimate the difference in means at week 24 with the lower one-sided 95% confidence limit, in line with how non-inferiority was evaluated for the primary analysis.

2. Sensitivity analysis using GEE model to incorporate longitudinal data and relax longitudinal modeling assumptions.

We used a generalized estimating equation (GEE) model to estimate the difference in week 24 FACT-L means between intervention groups. This approach incorporates additional longitudinal data from participants into the analysis. This model utilized FACT-L scores at baseline, week 12, and week 24, with estimation via GEE with unstructured correlation and robust standard errors. We included fixed effects for randomized intervention group, time from baseline (now as a categorical variable, to permit a non-linear trend in means), group-by-time interaction, and randomization stratification factors. A contrast was used to estimate the difference in means at week 24 with the lower one-sided 95% confidence limit, in line with how non-inferiority was evaluated for the primary analysis.

3. Sensitivity analysis using multiple imputation, excluding truncation due to death.

We used multiple imputation by chained equations (a.k.a., fully conditional specification) to impute FACT-L scores at week 24 that were missing for any reason other than death. Participants with missing FACT-L at week 24 who died before the week 24 survey window

closed (i.e., participants truncated due to death) were excluded prior to imputation and subsequent analysis. Variables considered for imputation included the following:

1. Randomized intervention group
2. Study site
3. Type of lung cancer
4. QOL (i.e., FACT-L) scores at baseline, week 12, and week 24
5. Depression (i.e., PHQ-9) scores at baseline, week 12, and week 24
6. ECOG performance status at baseline
7. Comorbidity (i.e., SCQ) score at baseline
8. Cancer mutation status (any mutation versus none)

We used the *mice* package in R (van Buuren and Groothuis-Oudshorn, 2011) to impute missing outcome data, fit the primary linear regression model on imputed data sets, and pool results. Based on the pooled results, we estimated the difference in means at week 24 with the lower one-sided 95% confidence limit, in line with how non-inferiority was evaluated for the primary analysis.

Supporting references:

- van Buuren S, Groothuis-Oudshoorn K (2011). “mice: Multivariate Imputation by Chained Equations in R.” *Journal of Statistical Software*, 45(3), 1-67.  
[doi:10.18637/jss.v045.i03](https://doi.org/10.18637/jss.v045.i03).

### **eAppendix 3.** Participant Race Selected as Other

Patients completed demographic questions in the baseline questionnaire which included questions about their self-reported race, ethnicity, gender, and relationship status. Patients could select as many of the provided options as needed when answering the question about their self-identified race. Five patients in the early PC arm and 3 patients in the stepped PC arm identified as a racial category that was not provided as one of the options for race.

In the early PC arm, 5 patients reported their race as: Hispanic/ispano (n = 2), Brazilian (n = 1), Greek (n = 1), Arab/Middle Eastern (n = 1).

In the stepped PC arm, 3 patients reported their race as: Hispanic/Hispano/Latina (n = 2), annoying [expletive] question (n = 1).

**eTable 1.** FACT-L Completion by Study Group at Weeks 36 and 48

| <b>Early Palliative Care<br/>N=257</b>                                                                                                                                                                                                                                                                                  | <b>Stepped PC<br/>N=250</b>                                                                                                                                                                                                                                                                                            |
|-------------------------------------------------------------------------------------------------------------------------------------------------------------------------------------------------------------------------------------------------------------------------------------------------------------------------|------------------------------------------------------------------------------------------------------------------------------------------------------------------------------------------------------------------------------------------------------------------------------------------------------------------------|
| <b>179</b> Eligible to complete FACT-L at 36 weeks<br><b>115</b> Completed within time window<br><b>64</b> Not completed within time window<br><b>36</b> Incomplete/declined<br><b>8</b> Hospitalized/hospice<br><b>10</b> Transferred care/lost to follow up<br><b>10</b> Other<br><b>69</b> Died<br><b>9</b> Withdrew | <b>176</b> Eligible to complete FACT-L at 36 weeks<br><b>122</b> Completed within time window<br><b>54</b> Not completed within time window<br><b>30</b> Incomplete/declined<br><b>8</b> Hospitalized/hospice<br><b>7</b> Transferred care/lost to follow up<br><b>9</b> Other<br><b>67</b> Died<br><b>7</b> Withdrew  |
| <b>162</b> Eligible to complete FACT-L at 48 weeks<br><b>104</b> Completed within time window<br><b>58</b> Not completed within time window<br><b>30</b> Incomplete/declined<br><b>9</b> Hospitalized/hospice<br><b>12</b> Transferred care/lost to follow up<br><b>7</b> Other<br><b>86</b> Died<br><b>9</b> Withdrew  | <b>151</b> Eligible to complete FACT-L at 48 weeks<br><b>103</b> Completed within time window<br><b>48</b> Not completed within time window<br><b>25</b> Incomplete/declined<br><b>5</b> Hospitalized/hospice<br><b>10</b> Transferred care/lost to follow up<br><b>8</b> Other<br><b>91</b> Died<br><b>8</b> Withdrew |

**eTable 2.** Baseline Characteristics by Week 24 FACT-L Completion

| Characteristic                      | N (%) <sup>a</sup>               |                                         | p-value <sup>b</sup> |
|-------------------------------------|----------------------------------|-----------------------------------------|----------------------|
|                                     | Completed Week 24 FACT-L (n=291) | Did not complete Week 24 FACT-L (n=216) |                      |
| <b>Age (years)</b>                  |                                  |                                         |                      |
| Mean (SD)                           | 65.5 (9.6)                       | 67.7 (10.9)                             | 0.018                |
| >75 years                           | 48 (16.5)                        | 53 (24.5)                               | 0.032                |
| <b>Gender, Woman</b>                | 158 (54.3) [n=291]               | 102 (47.4) [n=215]                      | 0.150                |
| <b>Race<sup>c</sup></b>             | [n=291]                          | [n=214]                                 |                      |
| African American or Black           | 33 (11.3)                        | 24 (11.2)                               | >0.99                |
| American Indian or Alaskan Native   | 1 (0.3)                          | 3 (1.4)                                 | 0.316                |
| Asian                               | 11 (3.8)                         | 3 (1.4)                                 | 0.169                |
| Native Hawaiian or Pacific Islander | 0 (0)                            | 0 (0)                                   | >0.99                |
| Other                               | 4 (1.4)                          | 4 (1.9)                                 | 0.727                |
| White                               | 245 (84.2)                       | 182 (85.0)                              | 0.805                |
| <b>Hispanic or Latino Ethnicity</b> | 4 (1.4) [n=286]                  | 4 (1.9) [n=207]                         | 0.726                |
| <b>Religion</b>                     | [n=288]                          | [n=207]                                 | 0.456                |
| Other Christian (e.g., Protestant)  | 124 (43.1)                       | 79 (38.2)                               |                      |
| Catholic                            | 104 (36.1)                       | 85 (41.1)                               |                      |
| None                                | 31 (10.8)                        | 21 (10.1)                               |                      |
| Jewish                              | 13 (4.5)                         | 15 (7.2)                                |                      |
| Other                               | 12 (4.2)                         | 6 (2.9)                                 |                      |
| Atheist                             | 3 (1.0)                          | 0 (0)                                   |                      |
| Muslim                              | 1 (0.3)                          | 1 (0.5)                                 |                      |
| <b>Relationship Status</b>          | [n=286]                          | [n=213]                                 | 0.097                |
| Married/partner                     | 200 (69.9)                       | 128 (60.1)                              |                      |
| Divorced/separated                  | 39 (13.6)                        | 34 (16.0)                               |                      |
| Widowed/loss of partner             | 29 (10.1)                        | 35 (16.4)                               |                      |
| Single                              | 18 (6.3)                         | 16 (7.5)                                |                      |

|                                                  |            |            |        |
|--------------------------------------------------|------------|------------|--------|
| <b>Education</b>                                 | [n=286]    | [n=206]    | 0.063  |
| High school graduate or less                     | 81 (28.3)  | 77 (37.4)  |        |
| Associate degree/technical school                | 71 (24.8)  | 54 (26.2)  |        |
| College graduate                                 | 65 (22.7)  | 42 (20.4)  |        |
| Master's, professional, or doctoral level degree | 69 (24.1)  | 33 (16.0)  |        |
| <b>Annual Income</b>                             | [n=267]    | [n=179]    | 0.120  |
| Less than \$25,000                               | 47 (17.6)  | 33 (18.4)  |        |
| \$25,000-\$49,999                                | 55 (20.6)  | 46 (25.7)  |        |
| \$50,000-\$99,999                                | 65 (24.3)  | 54 (30.2)  |        |
| \$100,000-\$149,999                              | 40 (15.0)  | 20 (11.2)  |        |
| \$150,000 or more                                | 60 (22.5)  | 26 (14.5)  |        |
| <b>Smoking Status</b>                            | [n=266]    | [n=194]    | <0.001 |
| Current or former smoker                         | 165 (62.0) | 149 (76.8) |        |
| Never smoker or <10 pack-years                   | 101 (38.0) | 45 (23.2)  |        |
| <b>Cancer Type</b>                               |            |            | 0.854  |
| Non-small Cell Lung Cancer                       | 227 (78.0) | 170 (78.7) |        |
| Small Cell Lung Cancer                           | 59 (20.3)  | 41 (19.0)  |        |
| Mesothelioma                                     | 5 (1.7)    | 5 (2.3)    |        |
| <b>Cancer Treatment</b>                          |            |            | 0.001  |
| Platinum-based doublet chemo                     | 129 (44.3) | 115 (53.2) |        |
| Radiation                                        | 47 (16.2)  | 45 (20.8)  |        |
| Oral targeted chemotherapy                       | 66 (22.7)  | 24 (11.1)  |        |
| Immunotherapy                                    | 42 (14.4)  | 19 (8.8)   |        |
| Single agent IV chemo                            | 5 (1.7)    | 7 (3.2)    |        |
| No treatment                                     | 1 (0.3)    | 5 (2.3)    |        |
| Combined radiation and chemo                     | 1 (0.3)    | 0 (0)      |        |
| Other treatment                                  | 0 (0)      | 1 (0.5)    |        |
| <b>Cancer Mutation Status</b>                    |            |            | <0.001 |
| Other or no mutation                             | 214 (73.5) | 188 (87.0) |        |
| EGFR                                             | 56 (19.2)  | 20 (9.3)   |        |



|                                                            |                     |                     |       |
|------------------------------------------------------------|---------------------|---------------------|-------|
| ALK                                                        | 16 (5.5)            | 5 (2.3)             |       |
| ROS                                                        | 2 (0.7)             | 3 (1.4)             |       |
| RET                                                        | 3 (1.0)             | 0 (0)               |       |
| <b>ECOG Performance Status</b>                             |                     |                     | 0.003 |
| 0 (Fully active with no restrictions)                      | 88 (30.2)           | 37 (17.1)           |       |
| 1 (Able to do light work)                                  | 163 (56.0)          | 143 (66.2)          |       |
| 2 (Unable to work and in bed < 50% of the day)             | 40 (13.7)           | 36 (16.7)           |       |
| <b>Medical Comorbidity by SCQ<sup>d</sup>, mean (SD)</b>   | 7.8 (4.2) [n=286]   | 8.7 (4.3) [n=201]   | 0.032 |
| <b>Quality of Life by FACT-L<sup>e</sup>, mean (SD)</b>    | 97.0 (19.3) [n=291] | 91.5 (19.6) [n=215] | 0.002 |
| <b>Depression Symptoms by PHQ-9<sup>f</sup>, mean (SD)</b> | 6.0 (5.0) [n=285]   | 6.8 (4.9) [n=201]   | 0.066 |
| <b>Coping Skills by Brief-COPE</b>                         |                     |                     |       |
| Approach-Oriented Coping <sup>g</sup> , mean (SD)          | 18.1 (3.8) [n=259]  | 17.7 (3.8) [n=177]  | 0.270 |
| Avoidant Coping <sup>h</sup> , mean (SD)                   | 6.2 (2.5) [n=268]   | 6.1 (2.4) [n=185]   | 0.429 |
| <b>Perceptions of Prognosis</b>                            |                     |                     |       |
| Goal of therapy “To cure my cancer”                        | 88 (31.8) [n=277]   | 66 (33.8) [n=195]   | 0.690 |
| “Yes” My cancer is curable                                 | 59 (23.0) [n=256]   | 54 (29.0) [n=186]   | 0.185 |
| <b>End-of-Life Care Communication</b>                      | 30 (10.8) [n=278]   | 30 (15.5) [n=193]   | 0.160 |

Abbreviations: PC, palliative care; SD, standard deviation; EGFR, epidermal growth factor receptor; ALK, anaplastic lymphoma kinase; ROS, ros oncogene; RET, ret proto-oncogene; ECOG, Eastern Cooperative Oncology Group; SCQ, Self-Administered Comorbidity Questionnaire; FACT-L, Functional Assessment of Cancer Therapy-Lung Scale; PHQ-9, Patient Health Questionnaire-9; Brief-COPE, Brief-Coping Orientation to Problems Experienced Inventory

<sup>a</sup> Data are N (%) unless otherwise reported.

<sup>b</sup> P-values are calculated using t-tests (continuous variables) and chi-square or Fisher’s exact test (categorical variables).

<sup>c</sup> Participants could check all applicable categories. Sum of percentages may exceed 100%.

<sup>d</sup> Score range, 0-36, with higher scores indicating greater comorbidity

<sup>e</sup> Score range, 0-136, with higher scores indicating better quality of life

<sup>f</sup> Score range, 0-27, with higher scores indicating more significant depression symptoms

<sup>g</sup> Score range, 6-24, with higher scores indicating greater use of approach-oriented coping strategies

<sup>h</sup> Score range: 4-16, with higher scores indicating greater use of avoidant coping strategies

**eTable 3.** FACT-L Completion Among Stepped PC Patients on Step 1 at All Study Timepoints

| Timepoint | Frequency (%) completed among patients on step 1 eligible to complete FACT-L |
|-----------|------------------------------------------------------------------------------|
| Week 6    | 202/236 (85.6%)                                                              |
| Week 12   | 150/186 (80.7%)                                                              |
| Week 18   | 119/161 (73.9%)                                                              |
| Week 24   | 117/143 (81.8%)                                                              |
| Week 30   | 98/131 (74.8%)                                                               |
| Week 36   | 86/111 (77.5%)                                                               |
| Week 42   | 66/95 (69.5%)                                                                |
| Week 48   | 66/85 (77.7%)                                                                |

**eTable 4** Sensitivity Analysis Model Estimates of Study Group Effects on Primary FACT-L 24-Week Outcome Measure

| Sensitivity Analysis <sup>a</sup>       | N <sup>b</sup> | Difference (lower one-sided 95% confidence limit) <sup>c</sup><br>Stepped PC minus Early Integrated PC |
|-----------------------------------------|----------------|--------------------------------------------------------------------------------------------------------|
| <i>Primary analysis (for reference)</i> | 291            | 2.9 (-0.1)                                                                                             |
| 1. Longitudinal mixed model             | 507            | 1.6 (-1.7)                                                                                             |
| 2. Longitudinal GEE model               | 507            | 0.8 (-2.6)                                                                                             |
| 3. Multiple imputation                  | 409            | 2.8 (-0.1)                                                                                             |

Abbreviations: CI=confidence interval; PC=palliative care; FACT-L=Functional Assessment of Cancer Therapy-Lung Scale; GEE=generalized estimating equation.

<sup>a</sup> Sensitivity analysis methods are described in eAppendix 2.

<sup>b</sup> N reflects the number of participants whose data were included in the model.

<sup>c</sup> Pre-specified non-inferiority margin was -4.5 (FACT-L). Comparing the lower one-sided 95% confidence limit with the non-inferiority margin corresponds to the primary one-sided 5% significance level test for non-inferiority.

**eFigure 1.** Stepped PC Study Procedures Example

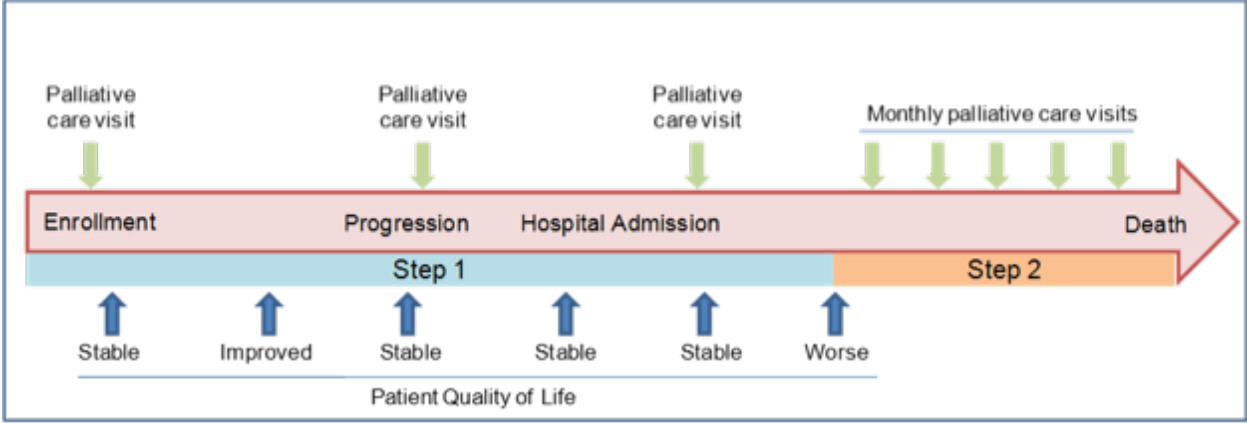

**eFigure 2.** Intervention Delivery Up to 24 and 48 Weeks

Legend: Bar heights represent (A) the proportion of documented visits (n=1583) with each topic discussed through week 24 (clinicians completed this documentation for 1180/1251 (94.3%) of face-to-face visits and 403 telephone calls), and (B) the proportion of documented visits (n=2549) with each topic discussed through week 48 (clinicians completed this documentation for 1812/1927 (94.0%) of face-to-face visits and 728 telephone calls). PC=palliative care

Panel A: Intervention Delivery Up to 24 Weeks

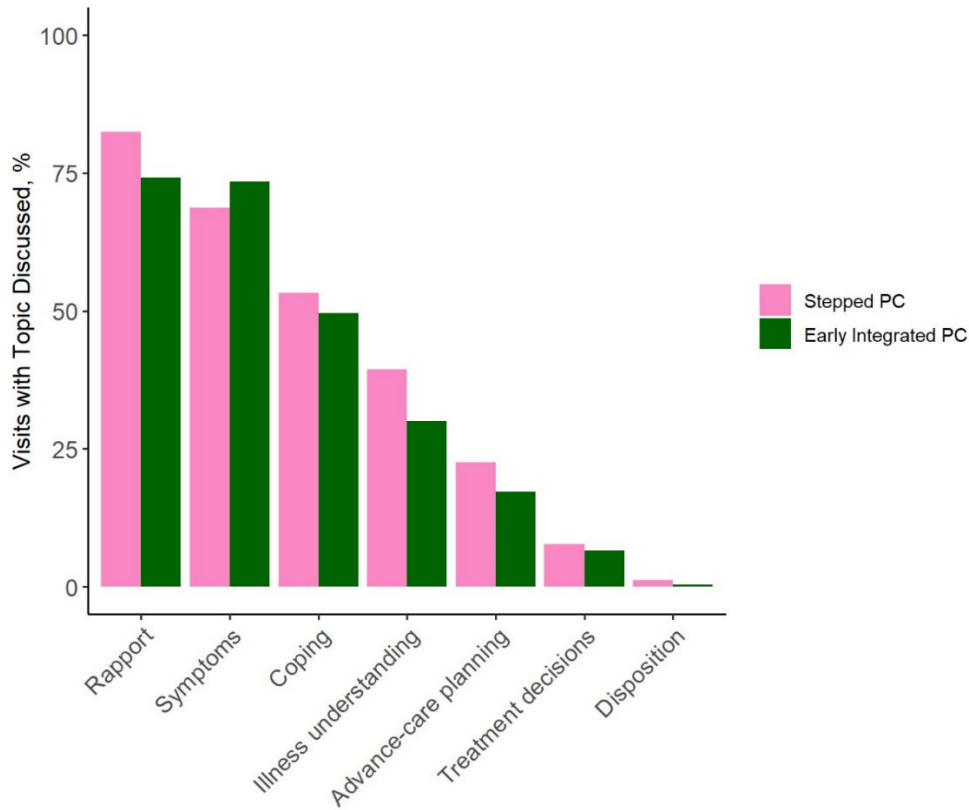

Panel B: Intervention Delivery Up to 48 Weeks

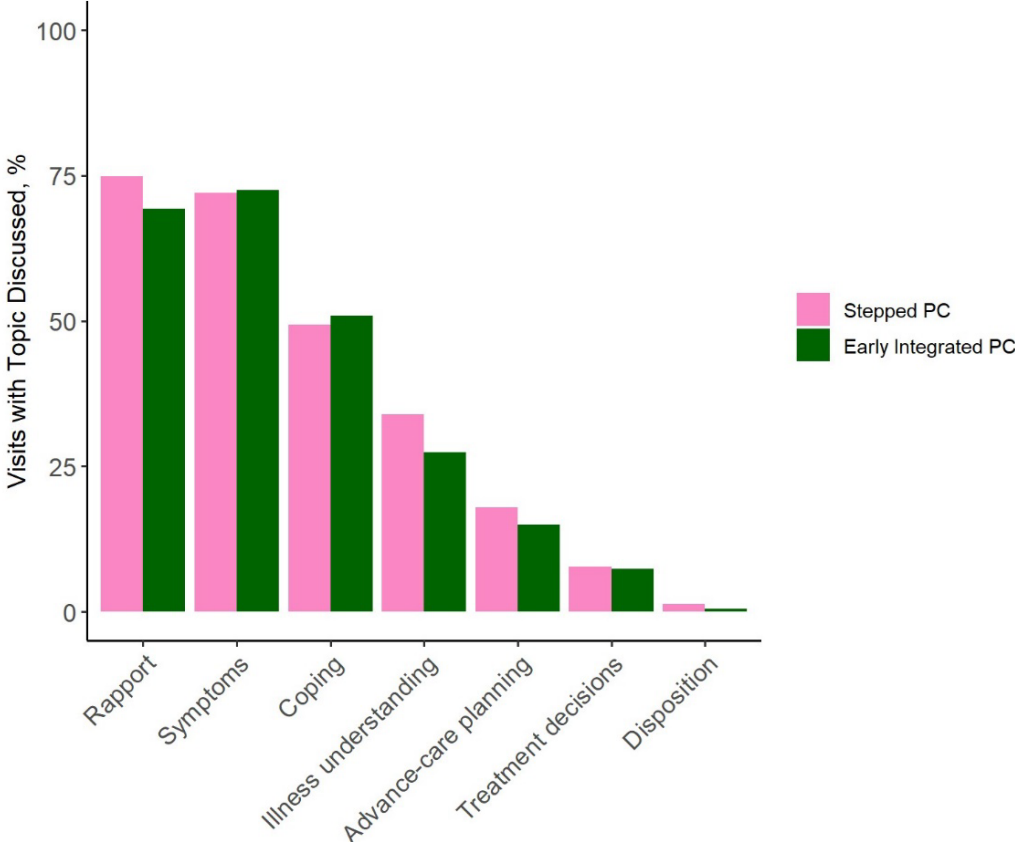

**eFigure 3:** Patient-Reported Quality of Life Over 48 weeks

Legend: On box plots, the ends of the boxes are located at the first and third quartiles. The horizontal line in the middle illustrates the median, and diamonds represent the mean. Whiskers extend to the highest and lowest values within 1.5 times the interquartile range, and dots beyond the whiskers reflect outlying data. Beneath the box plots, N reflects the number of patients in each group who completed the patient-reported assessment. FACT-L=Functional Assessment of Cancer Therapy-Lung Scale; PC=palliative care

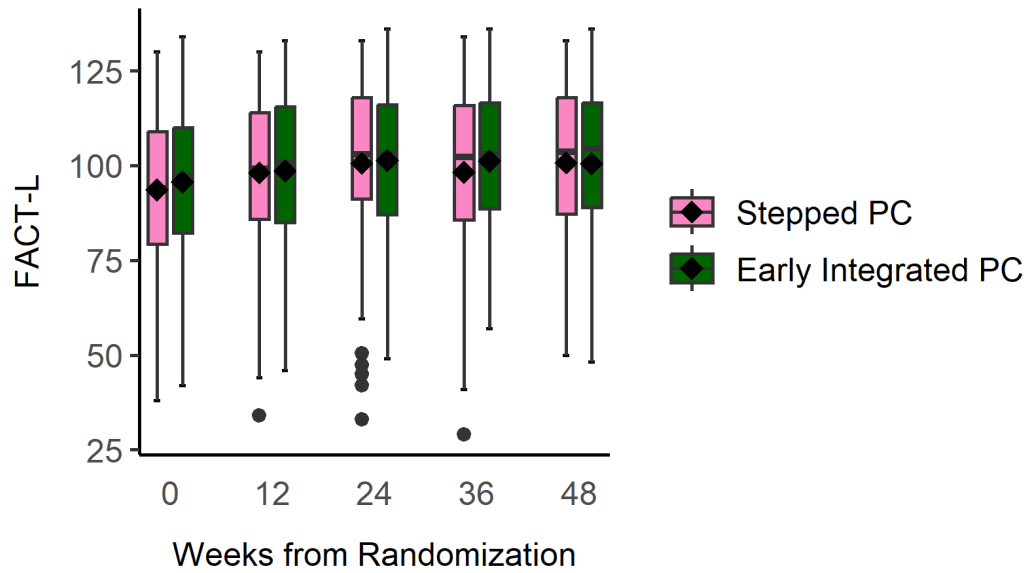

|                            | N   |     |     |     |     |
|----------------------------|-----|-----|-----|-----|-----|
| <b>Stepped PC</b>          | 250 | 171 | 146 | 122 | 103 |
| <b>Early Integrated PC</b> | 256 | 178 | 145 | 115 | 104 |
