# Supplementary material
Source: PubMed Central journal article supplement (PMC11145511)
Supplement: jama-e2410398-s004.pdf [file jama-e2410398-s004.pdf]

Temel JS, Jackson VA, El-Jawahri A, et al. Stepped palliative care for patients with advanced lung cancer. *JAMA*. Published online June 2, 2024. doi:10.1001/jama.2024.10398

## **Data Sharing Statement**

### **Data**

**Data available:** No

### **Additional Information**

**Explanation for why data not available:** The informed consent document did not include permission to make data publicly available
